# Supplementary material for: Physiological and transcriptomic analyses reveal novel insights into the cultivar-specific response to alkaline stress in alfalfa (Medicago sativa L.)
Source: Research Square preprint supplement (doi:10.21203/rs.3.rs-292953/v1), 2021-03-30
Supplement: Supplementary file 1 [file 4b997eb6a6a7f8b1e657ce79.xlsx]

## Sheet: Sheet1
Table S2 Summary of clean reads and mapping ratio
Sample ID	Raw Reads	Clean Reads	Raw Base(G)	Clean Base(G)	Effective Rate(%)	Error Rate(%)	Q20(%)	Q30(%)	GC Content(%)	Mapping ratio(%)
CGN-1	22494622	22218351	6.74839	6.62456	0.981652	0.0183484	97.87	94.1	43.43	0.7726
CGN-2	26949095	26514069	8.08473	7.9013	0.977312	0.0226879	97.82	93.93	42.89	0.7719
CGN-3	23492125	23185377	7.04764	6.92346	0.98238	0.0176198	98.04	94.4	43.05	0.775
CAG-1	32832622	32300670	9.84979	9.62701	0.977383	0.0226173	97.6	93.45	43.08	0.7721
CAG-2	27155489	26768272	8.14665	7.9713	0.978477	0.0215234	97.68	93.6	42.85	0.7724
CAG-3	26032114	25674954	7.80963	7.65293	0.979934	0.0200661	97.75	93.75	43.07	0.768
TGN-1	28292795	27877404	8.48784	8.3048	0.978435	0.0215646	97.84	93.95	43.04	0.772
TGN-2	24138063	23835527	7.24142	7.10038	0.980523	0.0194771	97.82	93.87	42.9	0.7681
TGN-3	23943415	23607637	7.18302	7.03462	0.97934	0.0206603	97.81	93.9	43.14	0.7801
TAG-1	23758764	23447958	7.12763	6.99481	0.981365	0.0186351	97.8	93.9	42.88	0.7727
TAG-2	26824007	26456752	8.0472	7.8858	0.979943	0.0200575	97.95	94.22	42.81	0.7728
TAG-3	27206952	26809719	8.16209	8.0068	0.980974	0.0190257	97.79	93.93	42.75	0.7737
							a
